# Supplementary material for: Ba2TiMnO6 two-dimensional nanosheets for rhodamine B organic contaminant degradation using ultrasonic vibrations
Source: Royal Society of Chemistry journal article supplement (doi:10.1039/d1ma00106j), 2021-01-01
Supplement: d1ma00106j1.pdf [file d1ma00106j1.pdf]

# Supporting Information

## Ba<sub>2</sub>TiMnO<sub>6</sub> Two Dimensional Nanosheets for Rhodamine B Organic Contaminant Degradation Using Ultrasonic Vibrations

Aditi Sharma<sup>1</sup>, Upasana Bhardwaj<sup>1</sup> & H.S. Kushwaha<sup>1,\*</sup>

<sup>1</sup>Material Research Centre, Malaviya National Institute of Technology (MNIT) Jaipur, India

<sup>1,\*</sup> Corresponding Author, E-mail: himmatsingh.mrc@mnit.ac.in, Phone- +918219479180

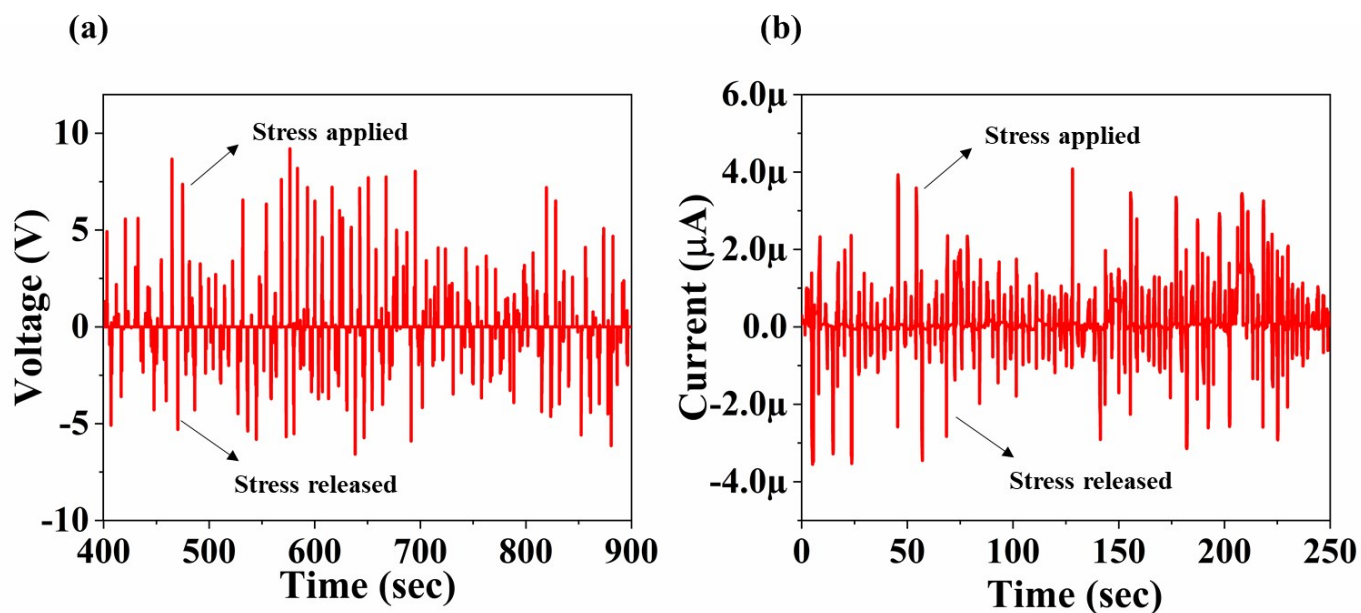

Fig. S1: The piezoelectric output of BTMO nanosheets, (a) Output voltage, (b) Output current.
